# Supplementary material for: Catalytic reduction of NACs by nano Fe3O4/quinone composites in the presence of a novel marine exoelectrogenic bacterium under hypersaline conditions
Source: Royal Society of Chemistry journal article supplement (doi:10.1039/c7ra00365j), 2017-01-01
Supplement: c7ra00365j1.pdf [file c7ra00365j1.pdf]

## **Supplementary data to the manuscript**

### **“Catalytic reduction of NACs by Nano Fe<sub>3</sub>O<sub>4</sub>/Quinone composites in the presence of a novel marine exoelectrogenic bacterium under hypersaline conditions”**

Haikun Zhang<sup>1,2</sup>, Xiaoke Hu<sup>1\*</sup>

1. Yantai Institute of Coastal Zone Research, Chinese Academy of Sciences, Yantai 264000, China
2. Key Laboratory of Industrial Ecology and Environmental Engineering (Ministry of Education), School of Environmental Science and Technology, Dalian University of Technology, Dalian 116024, China

\* Corresponding author phone: +86 535 2109127; fax: +86 535 2109127; E-mail:

[xkhucas@163.com](mailto:xkhucas@163.com)

Supplementary data consists of “Materials and methods” section and 5 figures.

## **Materials and methods**

**Preparation of Fe<sub>3</sub>O<sub>4</sub> nanoparticles:** 10.8 g FeCl<sub>3</sub>•6H<sub>2</sub>O and 3.98 g FeCl<sub>2</sub>•4H<sub>2</sub>O were dissolved in a three-necked flask (250 mL with 100 mL deionised water), bubbled with nitrogen for 20 min and mixed with magnetic stirring; Then, 20 mL NaOH (10M) was added dropwise within 30 min and maintained for 30 min; The obtained black solution was then heated to 90°C in a water bath, reacted under vigorous stirring for 60 min and then allowed to cool to room temperature; The black products were washed with ethanol and deionized water three times and dried in a vacuum oven at 60 °C for following steps.

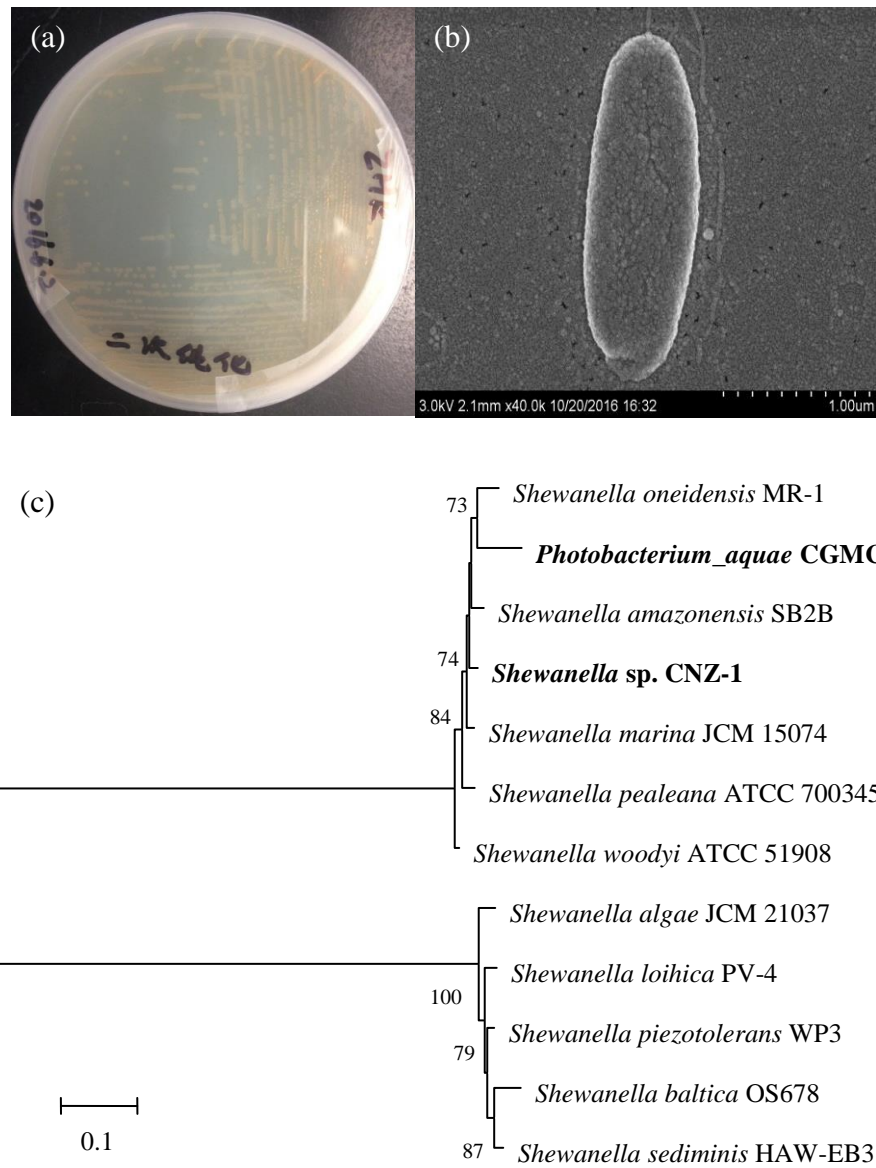

**Fig. S1.** Photograph (a), SEM photograph (b) and Phylogenetic tree (c) of CNZ-1.

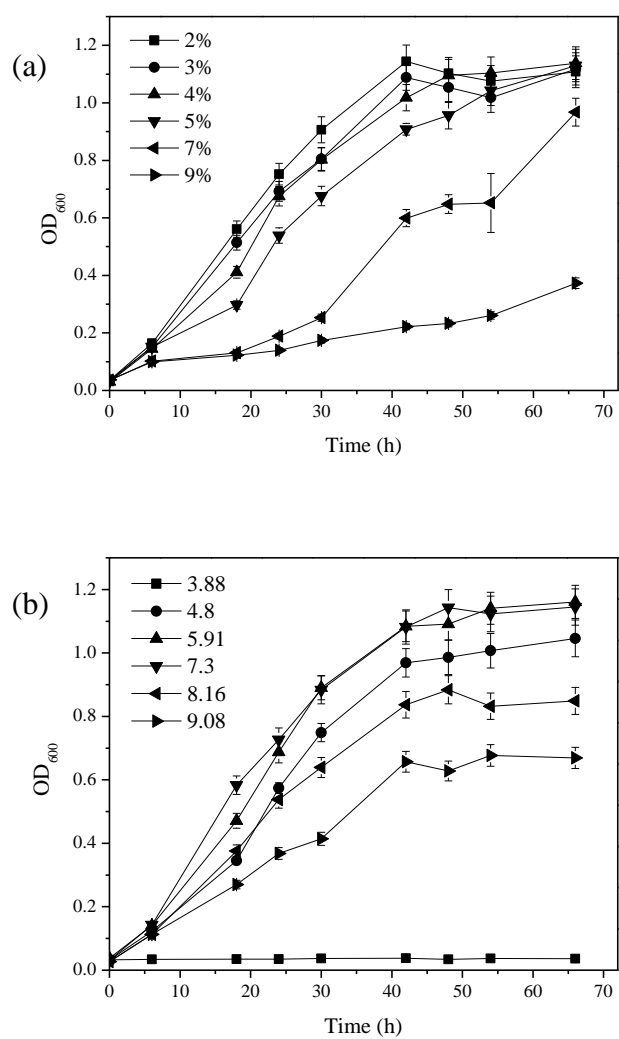

**Fig. S2.** Anaerobic growth of CNZ-1 in the presence of different NaCl concentration (a) and pH (b) in M2216EM at 30 °C.

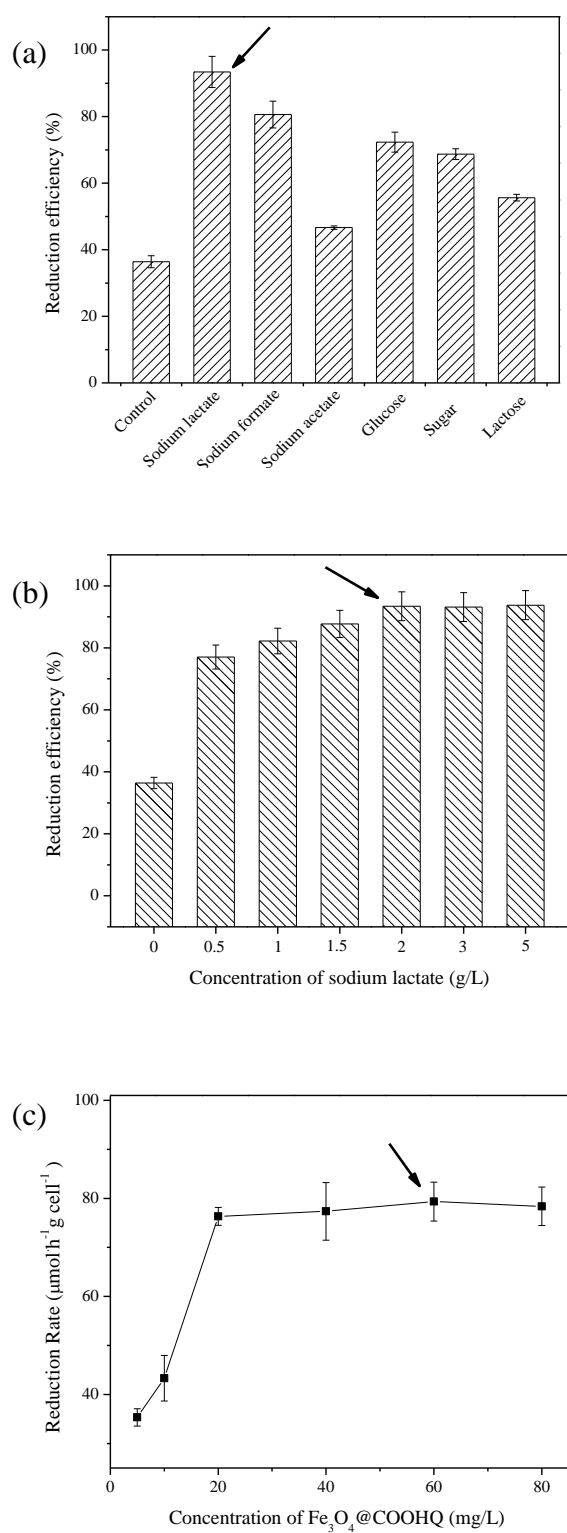

**Fig. S3.** Effects of carbon sources (a), sodium lactate concentration (b) and Fe<sub>3</sub>O<sub>4</sub>-COOHQ concentration (c) on NC reduction by strain CNZ-1.

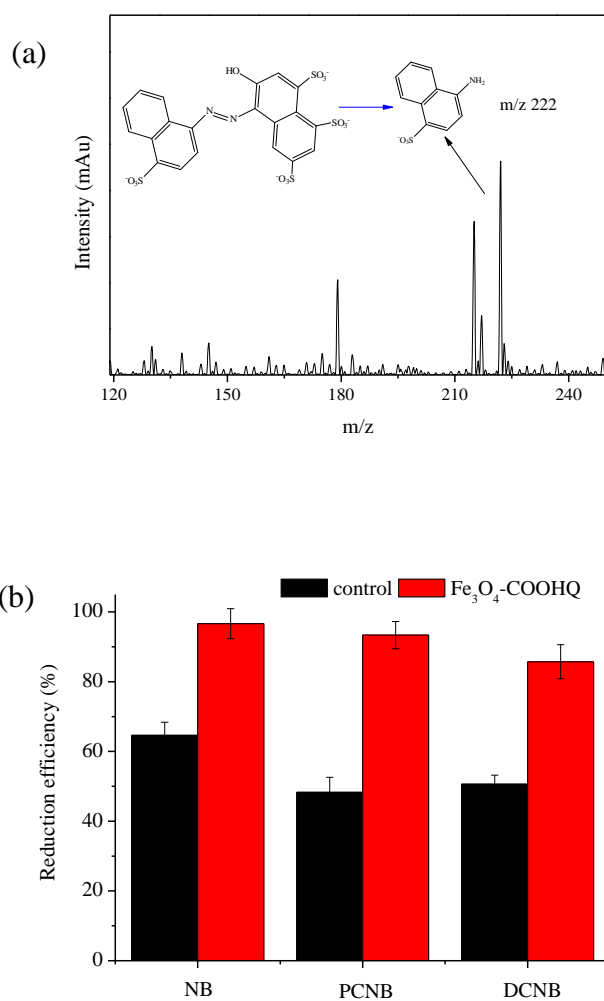

**Fig. S4.** Mass spectrum of NC bioreduction products (a), effects of Fe<sub>3</sub>O<sub>4</sub>-COOHQ on NB, PCNB and 2,5-DCNB reduction by strain CNZ-1 (b).

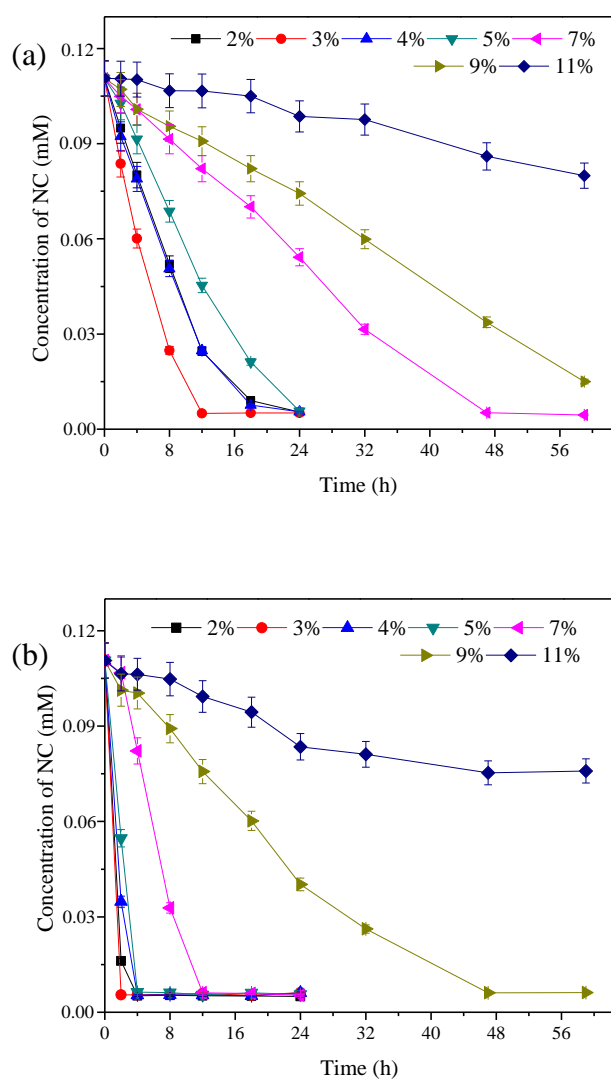

**Fig. S5.** Effect of NaCl (2-11%) on NC bioreduction in the absence (a)/presence (b) of  $\text{Fe}_3\text{O}_4\text{-COOHQ}$ .
